# Supplementary material for: Impact of workflow interruptions on baseline activities of the doctors working in the emergency department
Source: PubMed Central journal article supplement — BMJ Open Qual. 2022 Sep 12;11(3):e001813. doi: 10.1136/bmjoq-2022-001813 (PMC9472165; doi:10.1136/bmjoq-2022-001813), 2022-09-12
Supplement: bmjoq-2022-001813supp001.pdf [file bmjoq-2022-001813supp001.pdf]

**APPENDICES****Appendix A: Factors (with description) in part 1 of the Questionnaire**

| Sr. | Factors                                         | Description                                                                                                                                                                                                                                                                                                                                                                                                                                                             |
|-----|-------------------------------------------------|-------------------------------------------------------------------------------------------------------------------------------------------------------------------------------------------------------------------------------------------------------------------------------------------------------------------------------------------------------------------------------------------------------------------------------------------------------------------------|
|     | demographic details                             | age, gender, site (urban; suburban/rural), department, experience                                                                                                                                                                                                                                                                                                                                                                                                       |
| 1   | interruptions (IN)                              | You are mostly interrupted during medication-related tasks. (IN1)<br>You have to face visual and auditory distractions on daily basis. (IN2)<br>You are interrupted by phone calls in working hours. (IN3)<br>Rate of intrusions (such as co-workers asking for something, email that demands attention etc.) faced by you is high. (IN4)<br>Rate of Rumination (mind wandering etc.) faced by you is high. (IN5)<br>Interruptions are potential source of errors (IN6) |
| 2   | patient care (PA)                               | indirect PA is more than direct PA (PA1)                                                                                                                                                                                                                                                                                                                                                                                                                                |
| 3   | multitasking (MT)                               | often you found yourself in MT situation (MT1)<br>MT is higher for doctors than staff (MT2)<br>MT is potential source of error (MT3)                                                                                                                                                                                                                                                                                                                                    |
| 4   | personal/social activities in night shifts (NS) | you spend most of the night-shift alone (NS1)<br>You are interrupted more during night-shifts than during morning shifts (NS2)<br>In night shifts, you spend most of your time on productive activities such as patient's record (NS3)<br>you spend most of the time with smart phone in NS (NS4)<br>Medication related tasks consumed a very small proportion of time in NS (NS5)<br>Rate of personal activities (such as sleeping) in night shifts are high. (NS6)    |
| 5   | task switching (TS)                             | TS rate is higher among ED doctors than staff (TS1)                                                                                                                                                                                                                                                                                                                                                                                                                     |
| 6   | task break-in (TB)                              | Most of interruptions results in tasks breaks-in (TB1)                                                                                                                                                                                                                                                                                                                                                                                                                  |
| 7   | resumption of primary task (RT)                 | Resuming the primary task after distraction is difficult (RT1)                                                                                                                                                                                                                                                                                                                                                                                                          |
| 8   | professional communication (PC)                 | "Professional communication" (work related communication among colleagues) interrupts you while you are working (PC1)<br>You are interrupted by colleagues and other professionals (PC2)                                                                                                                                                                                                                                                                                |
| 9   | waiting (WA)                                    | You have to wait for patient's test reports (WA1)                                                                                                                                                                                                                                                                                                                                                                                                                       |
| 10  | breaks (BR)                                     | Breaks (tea, lunch etc.) are given to you in working hours. (BR1)                                                                                                                                                                                                                                                                                                                                                                                                       |
| 11  | information exchange (IE)                       | Portion of time spend on "information exchange" with patients is high. (IE1)                                                                                                                                                                                                                                                                                                                                                                                            |
| 12  | social/personal task (PT)                       | Proportion of your working time spend on social/personal tasks (phone calls) is high. (PT1)                                                                                                                                                                                                                                                                                                                                                                             |
| 13  | overtime (OT)                                   | How often you have to work overtime? (OT1)<br>overtime leads to fatigue, workplace anxiety and loss of concentration (OT2)                                                                                                                                                                                                                                                                                                                                              |

**Appendix B: Factors with (description) in part 2 of the Questionnaire**

| Sr. | Factors                            | Description                                                               | Example                                                |
|-----|------------------------------------|---------------------------------------------------------------------------|--------------------------------------------------------|
| 1   | Effect of number of patients (ENP) | Serving less number of patients will have positive effect on your overall | Reducing the target (no of patients to be checked in a |

---

|   |                                                  |                                                                                                    |                                                                    |
|---|--------------------------------------------------|----------------------------------------------------------------------------------------------------|--------------------------------------------------------------------|
|   |                                                  | performance.                                                                                       | shift)                                                             |
| 2 | Effect of relevant patients (ERP)                | Having patients relevant to your expertise will have positive effects on your overall performance. | Doctor will check only patients that are relevant to his expertise |
| 3 | Effect of working hours (EWH)                    | Reduced working hours will have positive effect on your overall performance.                       | Reducing the over time or working hours per day                    |
| 4 | Effect of frequent breaks (EFB)                  | Frequent breaks will have positive effect on your overall performance.                             | Providing tea breaks                                               |
| 5 | Effect of visual and auditory distractions (EVA) | Visual and auditory distractions will have positive effect on your overall performance.            | Distraction due to talking of two other doctors                    |
| 6 | Effect of multitasking (EMT)                     | Multitasking will have positive effect on your overall performance.                                | Writing a prescription and talking to patient simultaneously       |
| 7 | Effect of interruptions (EIN)                    | Interruptions will have positive effect on your overall performance.                               | Phone calls, visual and auditory distractions etc.                 |

---
